# Supplementary material for: Associations between Health Literacy, Trust, and COVID-19 Vaccine Hesitancy: The Case of Hong Kong
Source: MDPI journal article supplement (doi:10.3390/vaccines11030562), 2023-03-01
Supplement: s1 [file s1]

**Table S1.** Original Population and Matched Population

|                                    | Before PSM              |                          |         | After PSM               |                          |         |
|------------------------------------|-------------------------|--------------------------|---------|-------------------------|--------------------------|---------|
|                                    | Current survey<br>N (%) | Previous survey<br>N (%) | P value | Current survey<br>N (%) | Previous survey<br>N (%) | P value |
| Total participants                 | 401                     | 433                      |         | 392                     | 392                      |         |
| Gender                             |                         |                          | 0.389   |                         |                          | 0.617   |
| Male                               | 189 (47.1)              | 217 (50.1)               |         | 185 (47.2)              | 192 (49.0)               |         |
| Female                             | 212 (52.9)              | 216 (49.9)               |         | 207 (52.8)              | 200 (51.0)               |         |
| Age groups                         |                         |                          | 0.457   |                         |                          | 0.442   |
| 18-24                              | 42 (10.5)               | 53 (12.2)                |         | 40 (10.2)               | 46 (11.7)                |         |
| 25-34                              | 67 (16.7)               | 80 (18.5)                |         | 65 (16.6)               | 72 (18.4)                |         |
| 35-44                              | 77 (19.2)               | 70 (16.2)                |         | 77 (19.6)               | 62 (15.8)                |         |
| 45-54                              | 69 (17.2)               | 87 (20.1)                |         | 67 (17.1)               | 79 (20.2)                |         |
| ≥ 55                               | 146 (36.4)              | 143 (33.1)               |         | 143 (36.5)              | 133 (33.9)               |         |
| Education attainment               |                         |                          | 0.723   |                         |                          | 0.59    |
| Primary and below                  | 6 (1.5)                 | 10 (2.3)                 |         | 5 (1.3)                 | 9 (2.3)                  |         |
| Secondary                          | 117 (29.2)              | 118 (27.3)               |         | 116 (29.6)              | 104 (26.5)               |         |
| Post-secondary (non-degree course) | 63 (15.7)               | 75 (17.3)                |         | 63 (16.1)               | 65 (16.6)                |         |
| Post-secondary (degree course)     | 215 (53.6)              | 230 (53.1)               |         | 208 (53.1)              | 214 (54.6)               |         |
| Self-rated health status           |                         |                          | 0.888   |                         |                          | 0.916   |
| Poor                               | 27 (6.7)                | 26 (6.0)                 |         | 27 (6.9)                | 25 (6.4)                 |         |
| Fair                               | 163 (40.6)              | 172 (39.7)               |         | 161 (41.1)              | 160 (40.8)               |         |
| Good                               | 126 (31.4)              | 142 (32.8)               |         | 125 (31.9)              | 131 (33.4)               |         |
| Very good                          | 71 (17.7)               | 82 (18.9)                |         | 66 (16.8)               | 67 (17.1)                |         |
| Excellent                          | 14 (3.5)                | 11 (2.5)                 |         | 13 (3.3)                | 9 (2.3)                  |         |

Note: PSM = propensity score matching

**Table S2.** Difference in health literacy among the matched population

|                 | Mean (SD)     | P value |
|-----------------|---------------|---------|
| Current survey  | 92.41 (13.10) | 0.098   |
| Previous survey | 93.92 (12.29) |         |

**Table S3.** Participants' sociodemographic characteristics compared with Hong Kong population

| Variables       | Total (n =401) |      | 2020 Hong Kong census |
|-----------------|----------------|------|-----------------------|
|                 | n              | %    | %                     |
| Gender          |                |      |                       |
| Male            | 189            | 47.1 | 44.9                  |
| Female          | 212            | 52.9 | 55.1                  |
| Age groups      |                |      |                       |
| 18-24           | 42             | 10.5 | 9.9                   |
| 25-34           | 67             | 16.7 | 15.6                  |
| 35-44           | 77             | 19.2 | 17.8                  |
| 45-54           | 69             | 17.2 | 17.2                  |
| ≥ 55            | 146            | 36.4 | 39.5                  |
| District        |                |      |                       |
| HK island       | 70             | 17.3 | 16.6                  |
| Kowloon         | 120            | 29.9 | 30.6                  |
| New Territories | 211            | 52.4 | 52.8                  |

**Table S4. The associations among HL, Trust, and COVID-19 vaccine hesitancy estimated from the multivariable logistic regression model using the original categorizations for Likert questions <sup>a</sup>**

| Variables                         | First dose            |                                    | Booster dose          |                                    |
|-----------------------------------|-----------------------|------------------------------------|-----------------------|------------------------------------|
|                                   | Model 1<br>OR(95% CI) | Model 2 <sup>b</sup><br>OR(95% CI) | Model 1<br>OR(95% CI) | Model 2 <sup>b</sup><br>OR(95% CI) |
| FHL                               | 0.56(0.36-0.88)*      | 0.60(0.38-0.94)*                   | NS                    | NS                                 |
| IHL                               | NS                    | NS                                 | 0.47(0.30-0.74)*      | 0.47(0.30-0.74)*                   |
| CHL-1                             | 1.63(1.03-2.58)*      | 1.75(1.10-2.80)*                   | NS                    | NS                                 |
| CHL-2                             | NS                    | NS                                 | 1.79(1.14-2.81)*      | 1.79(1.14-2.81)*                   |
| CHL-3                             | 1.67(1.06-2.63)*      | 1.87(1.18-2.99)**                  | NS                    | NS                                 |
| Trust in health information from: |                       |                                    |                       |                                    |
| Government                        | /                     | 0.78(0.62-9.97)*                   | /                     | NS                                 |
| Healthcare professionals          | /                     | NS                                 | /                     | NS                                 |
| Family members and friends        | /                     | NS                                 | /                     | NS                                 |
| Social media                      | /                     | NS                                 | /                     | NS                                 |
| Mass media                        | /                     | NS                                 | /                     | NS                                 |

(Note: a = covariates included age, gender, educational attainment, income, health status, and chronic disease status; b = with the inclusion of Trust in health information from the government, healthcare professionals, family members and friends, social media, and mass media; \* =  $p < 0.05$ ; \*\* =  $p < 0.01$ ; / = not applicable; Abbreviation: HL = health literacy; FHL = functional health literacy; IHL = interactive health literacy; CHL-1 = the first subdomain of critical health literacy; CHL-2 = the second subdomain of critical health literacy; CHL-3 = the third subdomain of critical health literacy; NS= not significant)
